# Supplementary material for: Aurivillius Bi7Fe3−xNixTi3O21 nanostructures as recyclable photocatalysts
Source: Royal Society of Chemistry journal article supplement (doi:10.1039/c9nj02834j), 2019-01-01
Supplement: c9nj02834j1.pdf [file c9nj02834j1.pdf]

## Supporting Information

for

### **Aurivillius $\text{Bi}_7\text{Fe}_{3-x}\text{Ni}_x\text{Ti}_3\text{O}_{21}$ nanostructure towards recyclable photocatalysts**

Xi Xie<sup>a</sup>, Hui Sun<sup>a,d,\*</sup>, Zirou Xu<sup>a</sup>, Mingguai Wang<sup>b</sup>, Xiaobing Chen<sup>b</sup>, and Jie Han<sup>c,\*</sup>

<sup>a</sup> School of Physics Science and Technology, Yangzhou University, Yangzhou, Jiangsu, 225002, P.R. China

<sup>b</sup> Guangling College, Yangzhou University, Yangzhou, Jiangsu, 225002, P. R. China

<sup>c</sup> School of Chemistry and Chemical Engineering, Yangzhou University, Yangzhou, Jiangsu, 225002, P. R. China.

<sup>d</sup> National Laboratory of Solid State Microstructures and Department of Physics, Nanjing University, Nanjing, 210093, P. R. China.

E-mail: [hsun@yzu.edu.cn](mailto:hsun@yzu.edu.cn) and [hanjie@yzu.edu.cn](mailto:hanjie@yzu.edu.cn)

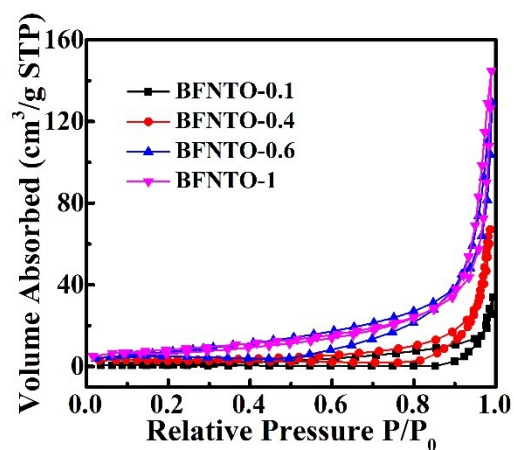

Figure S1 Adsorption-desorption isotherms of BFNTO samples.

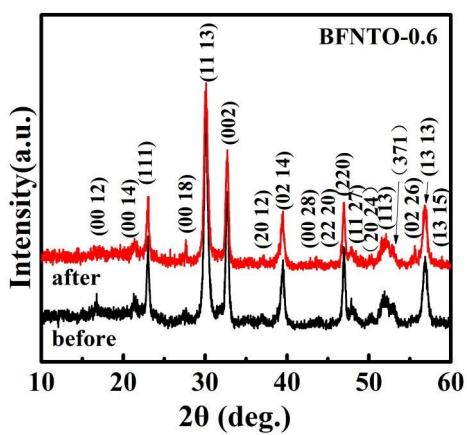

Figure S2 XRD patterns of BFNTO-0.6 sample before and after the photocatalytic RhB degradation.
